# Supplementary material for: A highly expeditious synthesis of a bicyclic iminosugar using the novel key step of [NMM]+[HSO4]− promoted conjugate addition and Mitsunobu reaction
Source: Royal Society of Chemistry journal article supplement (doi:10.1039/c3ra23467c), 2013-01-01
Supplement: c3ra23467c.pdf [file c3ra23467c.pdf]

# A highly expeditious synthesis of bicyclic iminosugar using novel key step of $[NMM]^+ [HSO_4]^-$ promoted conjugate addition and *Mitsunobu Reaction*

Virendra Prasad, Dhananjay Kumar, and Vinod K. Tiwari\*

Department of Chemistry, Faculty of Science, Banaras Hindu University, Varanasi-221005, India.

## Abstract:

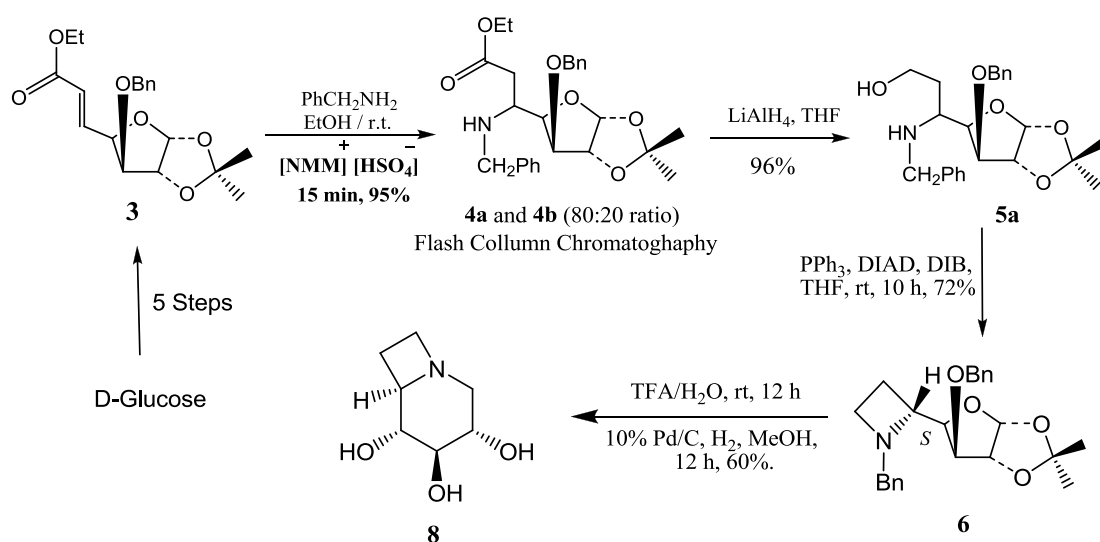

A simple and highly facile protocol has been developed for stereoselective synthesis of a novel bicyclic iminosugar analogue 1-deoxy-norcastanospermine from readily available D-glucose. *N*-methylmorpholinium hydrogen sulfate for the first time noticed as suitable catalyst for the facile conjugate addition of amine to glycosyl olefinic ester. Furthermore, the key step of the strategy is the internal reductive amination of glycosyl azetidine, obtained from glycosyl  $\beta$ -amino alcohol under *Mitsunobu* reaction condition.

Corresponding author. Tel.: +91-542-6702466; fax: +91-542-2368174; E-mail: [tiwari\\_chem@yahoo.co.in](mailto:tiwari_chem@yahoo.co.in)

| <i>Contents</i>                                                                                                                                                                                                                           | <b>Page</b> |
|-------------------------------------------------------------------------------------------------------------------------------------------------------------------------------------------------------------------------------------------|-------------|
| <b>1. General experimental</b>                                                                                                                                                                                                            | 2           |
| <b>2. Typical experimental procedure for the synthesis of ethyl-(3-<i>O</i>-benzyl-5,6-dideoxy-5-benzylamino-1,2-<i>O</i>-isopropylidene)-<math>\alpha</math>-D-<i>gluco</i> &amp; <math>\beta</math>-L-<i>ido</i>-heptofurannuronate</b> | 3           |
| <b>3. Synthesis and application of ionic liquids</b>                                                                                                                                                                                      | 5           |
| 3.1 Synthesis of <i>N</i> -methylmorpholinium methyl sulfonate                                                                                                                                                                            |             |
| 3.2 Synthesis of <i>N</i> -methylmorpholinium hydrogen sulfate                                                                                                                                                                            |             |
| <b>4. Synthesis of 5-benzylamino-5,6-dideoxy-6-hydroxymethyl-1,2-<i>O</i>-isopropylidene- 3-<i>O</i>-benzyl-<math>\alpha</math>-D-<i>gluco</i> &amp; <math>\beta</math>-L-<i>ido</i>-furanose</b>                                         | 5           |
| <b>5. Typical experimental procedure for intramolecular cyclization of glycosyl <math>\beta</math>-amino alcohol under <i>Mitsunobu</i> reaction condition</b>                                                                            | 6           |
| 5.1 Synthesis of 2-(3- <i>O</i> -benzyl-1,2- <i>O</i> -isopropylidene- $\beta$ -L- <i>ido</i> -furanose)-1-benzyl azetidine                                                                                                               |             |
| <b>6. Deprotection and <i>in situ</i> cyclization of glycosyl azetidine</b>                                                                                                                                                               |             |
| Synthesis of 1-deoxy-norcastanospermine                                                                                                                                                                                                   | 8           |
| <b>7. References</b>                                                                                                                                                                                                                      | 9           |
| <b>8. <math>^1\text{H}</math> NMR and <math>^{13}\text{C}</math> NMR of developed compounds</b>                                                                                                                                           | 9           |

## EXPERIMENTAL

**1. General Experimental:** All reagents and solvents were pure analytical grade materials purchased from Spectrochem/Aldrich and were used without further purification, if not stated otherwise. Glass wares were dried over an open flame before use in connection with an inert atmosphere ( $\text{N}_2$ ) and solvents were evaporated under reduced pressure at temperature  $<50^\circ\text{C}$ . Thin layer chromatography (TLC) was performed using silica gel 60 F-254 plates with  $\text{I}_2$  vapors as detecting agents followed by spraying with methanolic- $\text{H}_2\text{SO}_4$  solution and *Dragendorff* reagent. Column chromatography was carried out on silica gel (230-400 mesh, E Merck). Elemental analyses were performed on a Perkin-Elmer 2400 C, H, N analyzer and values were found to be within  $\pm 0.5\%$  of the calculated values. NMR spectra were recorded on JEOL AL300 FT-NMR Spectrometer (300 MHz  $^1\text{H}$  NMR and 75 MHz  $^{13}\text{C}$  NMR) and *TMS* (0.0 ppm) was used as an internal standard in  $^1\text{H}$  NMR. Chemical shift

values are reported in ppm relative to TMS as internal reference, unless otherwise stated; s (singlet), d (doublet), t (triplet), m (multiplet), dd (double doublet); J values are in hertz. Infrared spectra were recorded as KBr pellets by a Perkin-Elmer RX-1 (4000-450  $\text{cm}^{-1}$ ) spectrometer.

**2. Typical experimental procedure for synthesis of ethyl-(3-*O*-benzyl-5,6-dideoxy-5-benzylamino-1,2-*O*-isopropylidene)- $\alpha$ -D-glucopyranuronate (**4**):** A solution of (1*R*, 2*R*, 3*S*, 4*R*)-ethyl-(3-*O*-benzyl-1,2-*O*-isopropylidene-1,4-pentofuranose-4-yl)-hept-5-enoate (3.60 g, 10.33 mmol) in EtOH (15 ml), was added benzyl amine (1.11 ml, 10.36 mmol) and  $[\text{NMM}]^+[\text{HSO}_4]^-$  (in catalytic amount, 2 mmol %) and the reaction was magnetically stirred at room temperature (25 °C) for 20 min. The Solvent was evaporated under reduced pressure and the syrup thus obtained was dissolved in ethyl acetate (100 ml) and washed with  $\text{H}_2\text{O}$  (2  $\times$  25 ml). The organic layer was dried over  $\text{Na}_2\text{SO}_4$  and concentrated under reduced pressure to get crude product, which was subjected to flash column chromatography ( $\text{SiO}_2$ ) using 20% EtOAc in *n*-hexane as eluent and afforded compound **4** as major and minor isomers. Yield: 95% (diastereomeric ratio, 80:20).

*Ethyl-3-*O*-benzyl-5,6-dideoxy-5-benzylamino-1,2-*O*-isopropylidene- $\beta$ -L-ido-heptofurannuronate (**4a**):* Major isomer, Yellow oil; IR (KBr):  $\nu_{\text{max}}$   $\text{cm}^{-1}$  3350 (-NH), 3020, 2980, 2920 ( $\text{CH}_3$  and  $\text{CH}_2$  stretching), 1710 ( $\text{C}=\text{O}$ );  $^1\text{H}$  NMR (300 MHz,  $\text{CDCl}_3$ ):  $\delta$  = 7.32-7.20 (m, 10 H, Ar-*H*), 5.95 (d,  $J$  = 3.9 Hz, 1 H, H-1), 4.70 (d,  $J$  = 11.7 Hz, 1 H, - $\text{OCH}_A\text{Ph}$ ), 4.65 (d,  $J$  = 3.9 Hz, 1 H, H-2), 4.45 (d,  $J$  = 11.7 Hz, 1 H, - $\text{OCH}_B\text{Ph}$ ), 4.23 (dd,  $J$  = 8.7 Hz and 3.0 Hz, 1 H, H-4), 4.09 (q,  $J$  = 7.2 Hz, 2 H, - $\text{OCH}_2\text{CH}_3$ ), 3.94 (d,  $J$  = 3.0 Hz, 1 H, H-3), 3.85 and 3.82 (each d, each  $J$  = 12.0 Hz, each 1 H,  $\text{NHCH}_A\text{Ph}$  and - $\text{NHCH}_B\text{Ph}$ ), 3.52 (m, 1 H, H-5), 2.42 (dd,  $J$  = 14.8 and 4.4 Hz, 1 H, H-6<sub>A</sub>), 2.31 (dd,  $J$  = 15.0 Hz and 6.6 Hz, 1 H, H-6<sub>B</sub>), 1.79 (bs, 1 H, NH), 1.48 and 1.32 [each s, each 3 H,  $>\text{C}(\text{CH}_3)_2$ ], 1.22 (t,  $J$  = 7.20 Hz, 3 H, - $\text{OCH}_2\text{CH}_3$ );  $^{13}\text{C}$  NMR (75 MHz,  $\text{CDCl}_3$ ):  $\delta$  = 171.7 ( $\text{C}=\text{O}$ ), 140.5, 137.0, 128.5, 128.3, 128.2, 128.1, 127.9 & 126.8 (Ar-*C*), 111.6 [ $>\text{C}(\text{CH}_3)_2$ ], 104.9 (C-1), 82.3 (C-2), 81.7 (C-4), 81.6 (C-3), 71.4 (- $\text{OCH}_2\text{Ph}$ ), 60.4 ( $\text{OCH}_2\text{CH}_3$ ), 53.8 (C-5), 51.6 (- $\text{NHCH}_2\text{Ph}$ ), 36.4 (C-6), 26.7 & 26.3 [ $>\text{C}(\text{CH}_3)_2$ ], 14.2 ( $\text{OCH}_2\text{CH}_3$ ) ppm.

*Ethyl-3-*O*-benzyl-5,6-dideoxy-5-benzylamino-1,2-*O*-isopropylidene- $\alpha$ -D-glucopyranuronate (**4b**):* Minor isomer **4b** was isolated as colourless oil; IR (KBr):  $\nu_{\text{max}}$   $\text{cm}^{-1}$  3350 (NH), 3019, 2980, 2920 ( $\text{CH}_3$  and  $\text{CH}_2$  stretching), 1710 ( $\text{C}=\text{O}$ );  $^1\text{H}$  NMR (300 MHz,  $\text{CDCl}_3$ ):  $\delta$  = 7.37-7.24 (m, 10 H, Ar-*H*), 5.89 (d,  $J$  = 3.9 Hz, 1 H, H-1),

4.68 (d,  $J = 13.5$  Hz, 1 H,  $-\text{OCH}_A\text{Ph}$ ), 4.60 (d,  $J = 3.6$  Hz, 1 H, H-2), 4.54 (d,  $J = 11.7$  Hz, 1 H,  $-\text{OCH}_B\text{Ph}$ ), 4.18-4.09 (m, 4 H, H-4,  $-\text{OCH}_2\text{CH}_3$ , and H-3), 3.84 (d,  $J = 12.9$  Hz, 1 H,  $-\text{NHCH}_A\text{Ph}$ ), 3.73 (d,  $J = 12.6$  Hz, 1 H,  $-\text{NHCH}_B\text{Ph}$ ), 3.52 (m, 1 H, H-5), 2.82 (dd,  $J = 15.6$  and  $3.9$  Hz, 1 H, H-6<sub>A</sub>), 2.59 (dd,  $J = 15.9$  and  $6.6$  Hz, 1 H, H-6<sub>B</sub>), 1.47 and 1.31 [each s, each 3 H,  $>\text{C}(\text{CH}_3)_2$ ], 1.24 (t,  $J = 7.2$  Hz, 3 H,  $-\text{OCH}_2\text{CH}_3$ );  $^{13}\text{C}$  NMR (75 MHz,  $\text{CDCl}_3$ ):  $\delta = 172.4$  (C=O), 140.5, 137.5, 128.5, 128.3, 127.9, 127.8, 127.7 and 126.9 (Ar-C), 111.6 [ $>\text{C}(\text{CH}_3)_2$ ], 104.7 (C-1), 82.1 (C-2), 81.7 (C-4), 81.6 (C-3), 72.0 ( $-\text{OCH}_2\text{Ph}$ ), 60.3 ( $-\text{OCH}_2\text{CH}_3$ ), 52.6 (C-5), 51.2 ( $-\text{NHCH}_2\text{Ph}$ ), 35.7 (C-6), 26.7 and 26.3 [ $>\text{C}(\text{CH}_3)_2$ ], 14.2 ( $-\text{OCH}_2\text{CH}_3$ ) ppm.

A variety of known promising catalysts such as  $\text{InCl}_3$ , DBU, DABCO, starch,  $\text{Y}(\text{NO}_3)_3 \cdot 6\text{H}_2\text{O}$  and ionic liquids e.g. *N*-methylmorpholinium hydrogen sulfate  $[\text{NMM}]^+[\text{HSO}_4]^-$  and *N*-methylmorpholinium methyl sulfonate  $[\text{NMM}]^+[\text{CH}_3\text{SO}_3]^-$  were screened to identify a suitable activator for high diastereoselective addition, where no significant improvement in diastereoselectivity was noticed (Table 1). The predominant diastereoselectivity observed in this addition was mainly due to the presence of well-known alkene-arene  $\pi$  stacking effect shown on the basis of Felkin-Anh like transition state model.<sup>1-3</sup>

**Table 1.** Optimization of 1,4-conjugate addition of benzyl amine to olefinic ester **3**

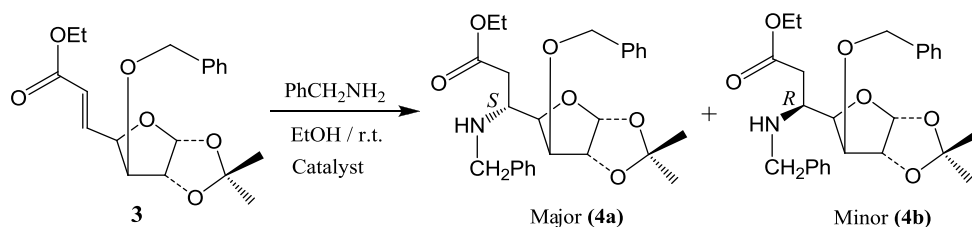

| Entry | Catalyst used                                                      | time <sup>a</sup> | Yield <sup>b</sup> (%) | dr (major/minor) <sup>c</sup> |
|-------|--------------------------------------------------------------------|-------------------|------------------------|-------------------------------|
| 1     | --                                                                 | 40 h              | 85                     | 78:22                         |
| 2     | $\text{InCl}_3$ (5 mmol %)                                         | 12 h              | 90                     | 75:25                         |
| 3     | DBU                                                                | 20 h              | 85                     | 74:26                         |
| 4     | DABCO                                                              | 20 h              | 85                     | 77:23                         |
| 5     | starch                                                             | 30 h              | 70                     | 76:24                         |
| 6     | $\text{Y}(\text{NO}_3)_3 \cdot 6\text{H}_2\text{O}$                | 18 h              | 91                     | 80:20                         |
| 7     | $\text{Y}(\text{NO}_3)_3 \cdot 6\text{H}_2\text{O}$ , solvent free | 25 h              | 85                     | 77:23                         |
| 8     | $[\text{NMM}]^+[\text{CH}_3\text{SO}_3]^-$                         | 20 min            | 95                     | 80:20                         |
| 9     | $[\text{NMM}]^+[\text{HSO}_4]^-$                                   | 15 min            | 95                     | 80:20                         |

<sup>a</sup> Time required. <sup>b</sup> isolated yield. <sup>c</sup> determined by  $^1\text{H}$ NMR signal

### 3. Synthesis of ionic liquids:

**3.1 Synthesis of *N*-methyldmorpholinium methyl sulfonate  $[NMM]^+[CH_3SO_3]^-$ :** *N*-Methyldmorpholine (10.1 g, 0.1 mol) was added to a 100 ml flask with a magnetic stirrer. Then, methanesulfonic acid (9.6 g, 0.1 mol) was dropped slowly into the flask over a period of 0.5 h in an ice bath. The reaction was allowed to run for another 5 h at room temperature and mixture was washed three times with ethyl acetate and dried at 90 °C under vacuum for 4 h. *N*-Methyldmorpholinium methyl sulfonate<sup>4</sup> was obtained in quantitative yield. <sup>1</sup>H NMR (300 MHz, DMSO):  $\delta$  = 2.42 (s, 3 H), 2.79 (s, 3 H), 3.05 (d, *J* = 10.5 Hz, 2 H), 3.34 (d, *J* = 12.3 Hz, 2 H), 3.63 (t, *J* = 12.6 Hz, 2 H), 3.94 (d, *J* = 12.3 Hz, 2 H), 9.87 (s, 1 H); <sup>13</sup>C NMR (75 MHz, DMSO):  $\delta$  = 38.6, 42.7, 52.6, 63.5 ppm.

**3.2 Synthesis of *N*-methyldmorpholinium hydrogen sulfate  $[NMM]^+[HSO_4]^-$ :**  $[NMM]^+[HSO_4]^-$  is prepared by mixing *N*-methyldmorpholine with concentrated H<sub>2</sub>SO<sub>4</sub> (98%) at 0 °C and stirring for 2 h at room temperature. After that the liquid is washed with EtOAc three times and dried at 80 °C in vacuum. *N*-Methyldmorpholinium hydrogen sulfate<sup>4</sup> was obtained in quantitative yield. <sup>1</sup>H NMR (300 MHz, DMSO):  $\delta$  = 2.79 (s, 3 H), 3.05 (s, 2 H), 3.32 (s, 2 H), 3.61 (s, 2 H), 3.92 (s, 2 H), 6.40 (s, 1 H) 9.67 (s, 1 H); <sup>13</sup>C NMR (75 MHz, DMSO):  $\delta$  = 42.6, 52.6, 63.4 ppm.

### 4. Synthesis of 5-benzylamino-5,6-dideoxy-6-hydroxymethyl-1,2-*O*-isopropylidene-3-*O*-benzyl- $\alpha$ -D-glucopyranose & $\beta$ -L-ido-furanose

**4.1 Synthesis of 5-benzylamino-5,6-dideoxy-6-hydroxymethyl-1,2-*O*-isopropylidene-3-*O*-benzyl- $\beta$ -L-ido-furanose (**5a**):** A solution of ethyl-3-*O*-benzyl-5,6-dideoxy-5-benzylamino-1,2-*O*-isopropylidene- $\beta$ -L-ido-heptofuranuronate (**4a**) in anhydrous THF (2.90 g, 6.37 mmol) was added drop wise to a stirring slurry of LiAlH<sub>4</sub> (0.242 g, 6.37 mmol, in 2 ml THF) under nitrogen atmosphere at 0 °C. After the complete addition, the stirring of the reaction mixture was continued for 30 min at same temperature and then at ambient temperature for an additional 2.5 h. The excess of reducing agent (LiAlH<sub>4</sub>) was quenched with saturated aqueous solution of Na<sub>2</sub>SO<sub>4</sub> and reaction mixture was filtered over a celite pad and solid cake was washed with tetrahydrofuran. The filtrate was evaporated under reduced pressure and residue thus obtained was dissolved in ethyl acetate, washed with water, dried (over anhyd. Na<sub>2</sub>SO<sub>4</sub>) and evaporated under reduced pressure to give a residual mass which on flash column chromatography over SiO<sub>2</sub> (230–400 mesh) using

chloroform-methanol (97:2) as eluent gave amino alcohol **5a** in 96% yield as a colorless oil. IR (KBr):  $\nu_{\max}$   $\text{cm}^{-1}$  3346, 2927 and 2856;  $^1\text{H}$  NMR (300 MHz,  $\text{CDCl}_3$ ):  $\delta$  = 7.36-7.25 (m, 10 H, Ar-*H*), 5.96 (d,  $J$  = 3.6 Hz, 1 H, H-1), 4.70 (d,  $J$  = 12.0 Hz, 1 H, - $\text{OCH}_\text{A}\text{Ph}$ ), 4.66 (d,  $J$  = 3.9 Hz, 1 H, H-2), 4.41 (d,  $J$  = 12.0 Hz, 1 H, - $\text{OCH}_\text{B}\text{Ph}$ ), 4.25 (dd,  $J$  = 9.60 and 3.0 Hz, 1 H, H-4), 3.93 (d,  $J$  = 12.0 Hz, 1 H, - $\text{NHCH}_2\text{Ph}$ ), 3.85 (d,  $J$  = 3.0 Hz, 1 H, H-3), 3.84 (d,  $J$  = 12.3, 1 H, - $\text{NHCH}_2\text{Ph}$ ), 3.78-3.75 (m, 2 H,  $\text{CH}_2\text{OH}$ ), 3.36 (m, 1 H, H-5), 1.62-1.55 (m, 2 H, H-6), 1.50 and 1.34 (each s, each 3 H,  $>\text{C}(\text{CH}_3)_2$ );  $^{13}\text{C}$  NMR (75 MHz,  $\text{CDCl}_3$ ):  $\delta$  = 139.5, 136.8, 128.5, 128.5, 128.2, 128.0, and 127.1 (Ar-C), 111.6 [ $>\text{C}(\text{CH}_3)_2$ ], 104.7 (C-1), 81.8 (C-2), 81.6 (C-4), 81.2 (C-3), 71.7 (- $\text{OCH}_2\text{Ph}$ ), 62.3 (C-7), 56.8 (- $\text{NHCH}_2\text{Ph}$ ), 50.7 (C-5), 29.2 (C-6), 26.7 and 26.2 [ $>\text{C}(\text{CH}_3)_2$ ] ppm; Anal. Calc. for  $\text{C}_{24}\text{H}_{31}\text{NO}_5$ : C, 69.70; H, 7.56; N, 3.39. Found: C, 69.35; H, 7.62; N, 3.27.

Similarly, the 5-benzylamino-5,6-dideoxy-6-hydroxymethyl-1,2-*O*-isopropylidene-3-*O*-benzyl- $\alpha$ -D-glucopyranose was obtained by LAH reduction of compound ethyl-3-*O*-benzyl-5,6-dideoxy-5-benzylamino-1,2-*O*-isopropylidene- $\alpha$ -D-glucopyranuronate (0.2 g) in anhydrous THF (10 mL). The physical data of developed compound is closely matched with reported earlier.<sup>5</sup>

## 5. Typical experimental procedure for intramolecular cyclization of glycosyl $\beta$ -amino alcohol under Mitsunobu reaction condition

**5.1 Synthesis of 2-(3-*O*-benzyl-1,2-*O*-isopropylidene- $\beta$ -L-ido-furanose)-1-benzyl azetidine (6):** A solution of 5-benzylamino-5,6-dideoxy-6-hydroxymethyl-1,2-*O*-isopropylidene-3-*O*-benzyl- $\beta$ -L-ido-furanose (**5a**, 0.5 g, 1.21 mmol), diisopropyl azodicarboxylate (DIAD) (0.05 g, 0.24 mmol, 0.2 eq.), triphenylphosphine ( $\text{Ph}_3\text{P}$ ) (0.4 g, 1.52 mmol) and diacetoxiodobenzene (DIB) (0.59 g, 1.8 mmol) in dry THF was added slowly and stirred magnetically at 0 °C under inert atmosphere for 30 min. Reaction mixture was stirred magnetically at room temperature for next 10 h. The reaction mass was concentrated under reduced pressure and obtained crude mass was chromatographed over  $\text{SiO}_2$  column using chloroform-methanol (96:4) as eluent to give the glycosyl azetidine as colourless oil in 72% yield.  $^1\text{H}$  NMR (300 MHz,  $\text{CDCl}_3$ ):  $\delta$  = 7.36-7.26 (m, 10 H, Ar-*H*), 5.93 (d,  $J$  = 3.6 Hz, 1 H, H-1), 5.01-4.93 (d, 3 H, - $\text{OCH}_2\text{Ph}$ , H-2), 4.68 (d,  $J$  = 11.7 Hz, 1 H, - $\text{NCH}_\text{A}\text{Ph}$ ), 4.65 (d,  $J$  = 3.9 Hz, 1 H, H-4), 4.45 (d,  $J$  = 11.7 Hz, 1 H, - $\text{NCH}_\text{B}\text{Ph}$ ), 4.19 (d,  $J$  = 8.1 Hz, 1 H,  $>\text{NCH}<$ ), 3.89 (s, 1 H, H-3), 3.73 (q,  $J$  = 11.7 Hz, 12 Hz, 2 H,  $>\text{N}-\text{CH}_2-$ ), 2.02 (s, 2 H,  $>\text{CH}_2$ ), 1.48 and 1.41 (each s, each 3 H,  $>\text{C}(\text{CH}_3)_2$ );  $^{13}\text{C}$  NMR (75 MHz,  $\text{CDCl}_3$ ):

$\delta$  = 136.8, 133.1, 132.9, 132.2, 128.5, 128.4, 128.3, 128.1, 128.0 and 127.9 (each Ar-C), 111.64 [ $>C(CH_3)_2$ ], 104.6 (C-1), 81.8 (C-2), 81.3 (C-4), 71.6 (C-3), 69.8 (-OCH<sub>2</sub>Ph), 62.7 (-NCH<sub>2</sub>Ph), 54.2 ( $>NCH<$ ), 40.4 ( $>NCH_2-$ ), 26.7 and 26.2 [ $>C(CH_3)_2$ ], 14.1 ( $>CH_2$ ) ppm.

Following the *Mitsunobu* reaction condition, DEAD/PPh<sub>3</sub> induced intramolecular cyclization of glycosyl  $\beta$ -amino alcohol was carried out in anhydrous THF to afford 2-(3-*O*-benzyl-1,2-*O*-isopropylidene- $\beta$ -L-*ido*-furanose)-1-benzyl azetidine **6**.<sup>7</sup> DEAD is known to be toxic, shock sensitive and thermally unstable, thus the diisopropyl azodicarboxylate (DIAD) was used because it is less expensive, reportedly easier to handle and has previously been proved to allow use of a wider range of nucleophiles. DIAD/PPh<sub>3</sub> mediated intramolecular cyclization of compound **5** was effective and fetched the product in high yield (72%), but required excess amount of reagent.

**Table 2.** Cycle of catalytic intramolecular cyclization of glycosyl  $\beta$ -amino alcohol **5a**

| entry | amino alcohol<br>(eq.) | Ph <sub>3</sub> P<br>(eq.) | DEAD<br>(eq.) | DIAD<br>(eq.) | DIB | yield<br>(%) |
|-------|------------------------|----------------------------|---------------|---------------|-----|--------------|
| 1     | 1.0                    | 1.2                        | 1.2           | -             | -   | 68           |
| 2     | 1.0                    | 1.5                        | 1.5           | -             | -   | 70           |
| 3     | 1.0                    | 1.5                        | 0.1           | -             | 2.0 | 72           |
| 4     | 1.0                    | 1.2                        | -             | 1.2           | -   | 70           |
| 5     | 1.0                    | 1.5                        | -             | 1.5           | -   | 73           |
| 6     | 1.0                    | 1.2                        | -             | 0.2           | 1.5 | 72           |

Developing a strategy which could reduce the quantity of DIAD in the reaction would be of vital importance to expedite synthetic protocol for scale-up synthesis. Employing diacetoxyiodobenzene (DIB) to oxidize the 1,2-dicarbisoxyhydrazine back to DIAD during intramolecular cyclization of **5a**



was visualized.<sup>6</sup> The desired azetidine was formed in good yield using the initial conditions of 0.2 equiv of DIAD in combination with 1.5 equiv of each, DIB and PPh<sub>3</sub>. Eventually, optimal conditions were determined to be 0.2 equiv of **9** and 1.2 and 1.5 equiv of both **11** and **12** respectively (Table 2, entry 6).

2-(3-*O*-benzyl-1,2-*O*-isopropylidene-β-*L*-ido-furanose)-1-benzyl azetidine (**6**) could also be obtained from amino alcohol **5a** by reacting with DIAD (1.5 eq) and PPh<sub>3</sub> (1.5 eq.) in dry THF for 12 hours.<sup>7</sup> The progress of reaction was monitored on TLC, which after completion was concentrated under reduced pressure followed by extraction with CH<sub>2</sub>Cl<sub>2</sub>. The organic layer was dried over anhydrous Na<sub>2</sub>SO<sub>4</sub> and concentrated under reduced pressure to afford a crude mass, which on silica-gel column chromatography and elution with CHCl<sub>3</sub>–CH<sub>3</sub>OH (98:2) afforded glycosyl azetidine **6** as a colorless oil in 70 % yield.

**6. Deprotection (and *in situ* cyclization) of glycosyl azetidine (**6**): Synthesis of 1-deoxy-norcastanospermine (**8**):** A solution of 2-(3-*O*-benzyl-1,2-*O*-isopropylidene-β-*L*-ido-furanose)-1-benzyl azetidine (**6**, 0.25 g, 0.6 mmol) in TFA-H<sub>2</sub>O (3:2, 2 ml) was stirred at 25 °C for 2 h. Trifluoroacetic acid was co-evaporated with benzene to furnish a thick liquid, which was directly used in the next reaction. To a solution of the above product in methanol, added 10% Pd-C (0.05 g) and solution was hydrogenated under the atmosphere of H<sub>2</sub> at 80 psi pressure for 20 h. The catalyst was filtered through celite, washed with methanol and the filtrate concentrated to get crude compound. The crude compound was washed with chloroform (which was discarded) and thick oil thus obtained was dissolved in methanol and stirred with basic ion exchange resin IRA 400 for 10 min. Filtration through celite and concentration of the methanol under reduced pressure afforded 1-deoxy-norcastanospermine in 60% yield as colourless oil. <sup>1</sup>H NMR (300 MHz, CD<sub>3</sub>COCD<sub>3</sub>): δ = 4.72 (m, 1 H), 3.29 (q, *J* = 9.0 Hz, 1 H), 4.07 (d, *J* = 3.9 Hz, 1 H), 3.98 (dd, *J* = 9.0 Hz and 4.5 Hz, 1 H), 3.91 (d, *J* = 9.3 Hz, 1 H), 3.78 (t, *J* = 4.8 Hz, 1 H), 3.45 (d, *J* = 11.5 Hz and 4.5 Hz, 1 H), 3.30 (d, *J* = 10.8 Hz, 1 H), 2.75 (s, 1 H), 2.64 (d, *J* = 8.4 Hz, 1 H), 2.59 (d, *J* = 10.8 Hz, 1 H); <sup>13</sup>C NMR (75 MHz, CD<sub>3</sub>COCD<sub>3</sub>): δ = 74.6, 70.1, 69.3, 61.5, 55.1, 50.0, 19.3 ppm; Anal. Calc. for C<sub>7</sub>H<sub>13</sub>NO<sub>3</sub>: C, 52.82; H, 8.23; N, 8.80. Found: C, 52.95; H, 8.15; N, 8.71.



## 7. References:

1. R. P. Tripathi, R. Tripathi, V. K. Tiwari, L. Bala, S. Sinha, A. Srivastava, R. Srivastava and B. S. Srivastava, *Eur. J. Med. Chem.*, **2002**, *37*, 773.
2. N. T. Patil, J. N. Tilekar and D. D. Dhavale, *J. Org. Chem.* **2001**, *66*, 1065-1074.
3. A. R. Khan, R. P. Tripathi, V. K. Tiwari, R. C. Mishra, V. J. M. Reddy and J. K. Saxena, *J. Carbohydrate Chem.*, **2002**, *21*, 587.
4. V. Prasad, R. R. Kale, B. B. Mishra, D. Kumar and V. K. Tiwari, *Org. Lett.*, **2012**, *14*, 2936.
5. D. Katiyar, V. K. Tiwari, N. Tiwari, S. S. Verma, S. Sinha, A. Giakwad, A. Srivastava, V. Chaturvedi, R. Srivastava, B. S. Srivastava and R. P. Tripathi, *Eur. J. Med. Chem.* **2005**, *40*, 351.
6. (a) T. Y. S. But, P. H. Toy, *J. Am. Chem. Soc.*, **2006**, *128*, 9636; (b) R. D. Richardson and T. Wirth, *Angew. Chem. Int. Ed.*, **2006**, *45*, 4402.
7. A. Singh, B. B. Mishra, R. R. Kale, D. Kushwaha and V. K. Tiwari, *Synthetic Commun.*, **2012**, *42*, 3598.

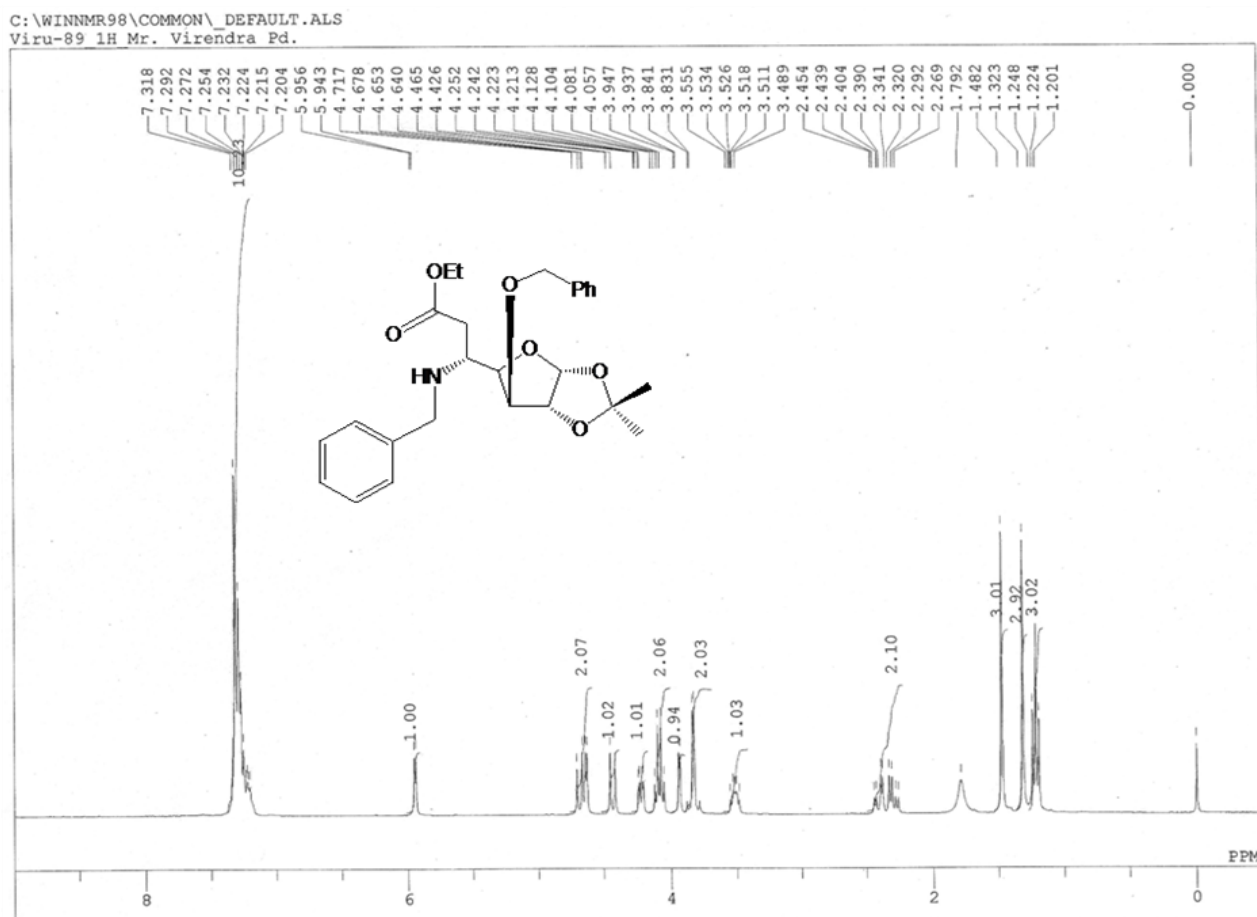

**Figure 1:**  $^1\text{H}$  NMR of ethyl-3-O-benzyl-5,6-dideoxy-5-benzylamino-1,2-O-isopropylidene- $\beta$ -L-ido-heptofurannuronate

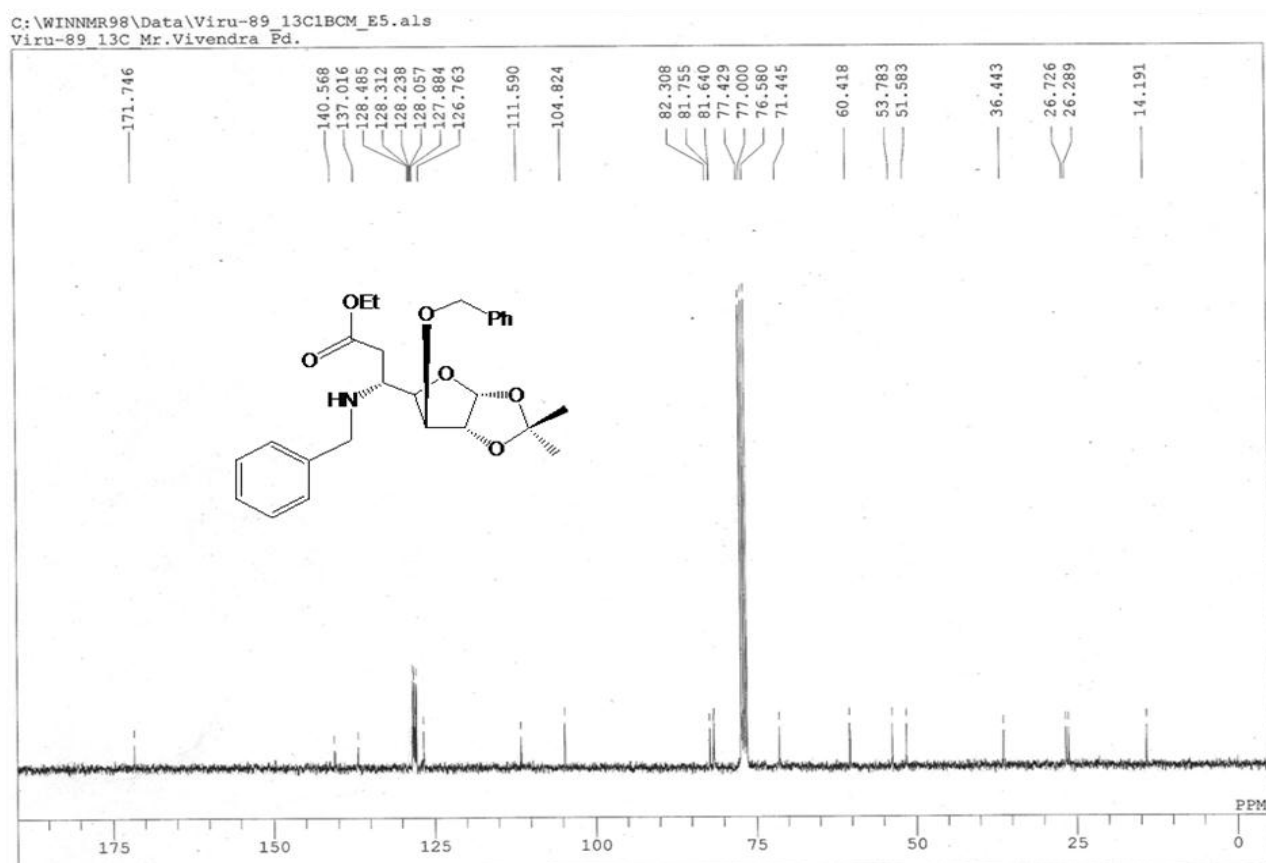

**Figure 2:**  $^{13}\text{C}$  NMR of ethyl-3-O-benzyl-5,6-dideoxy-5-benzylamino-1,2-O-isopropylidene- $\beta$ -L-ido-heptofurannuronate

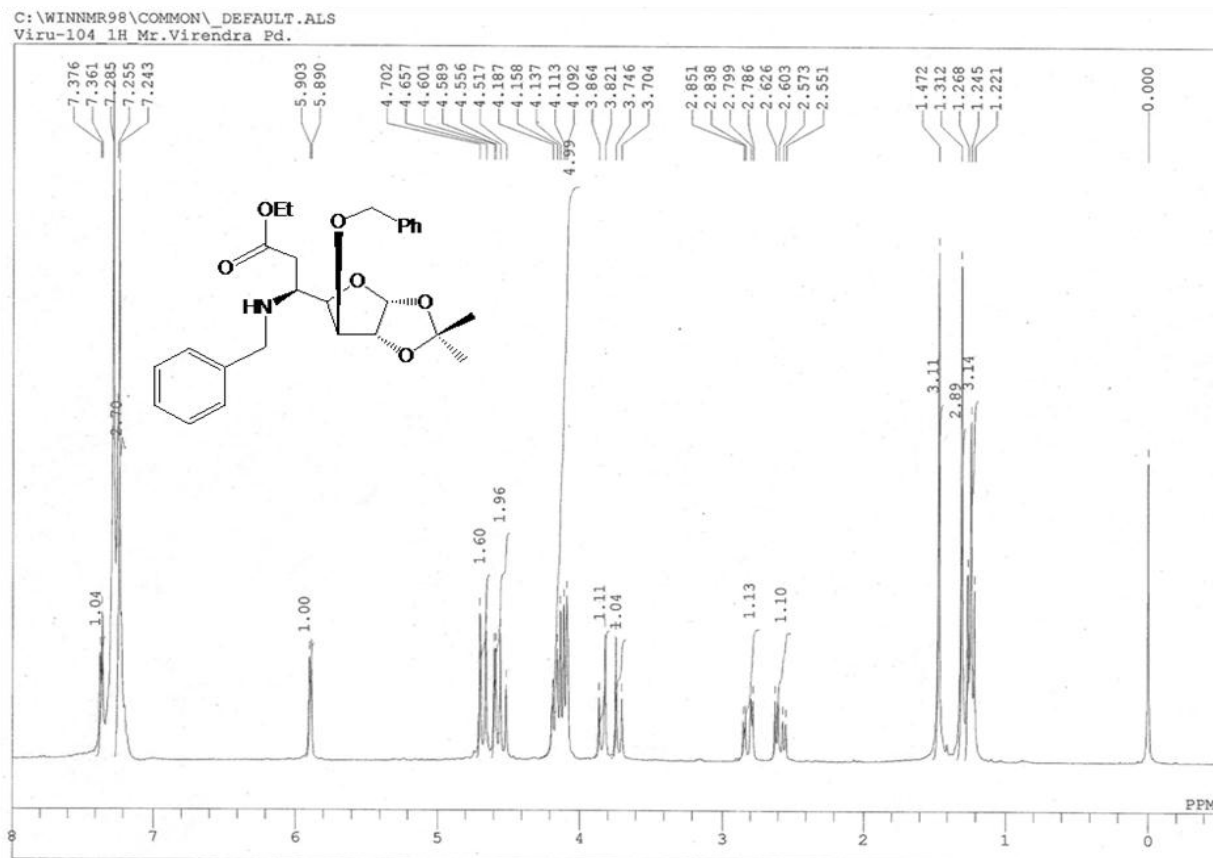

**Figure 3:**  $^1\text{H}$  NMR of ethyl-3-O-benzyl-5,6-dideoxy-5-benzylamino-1,2-O-isopropylidene- $\alpha$ -D-gluco-heptofurannuronate

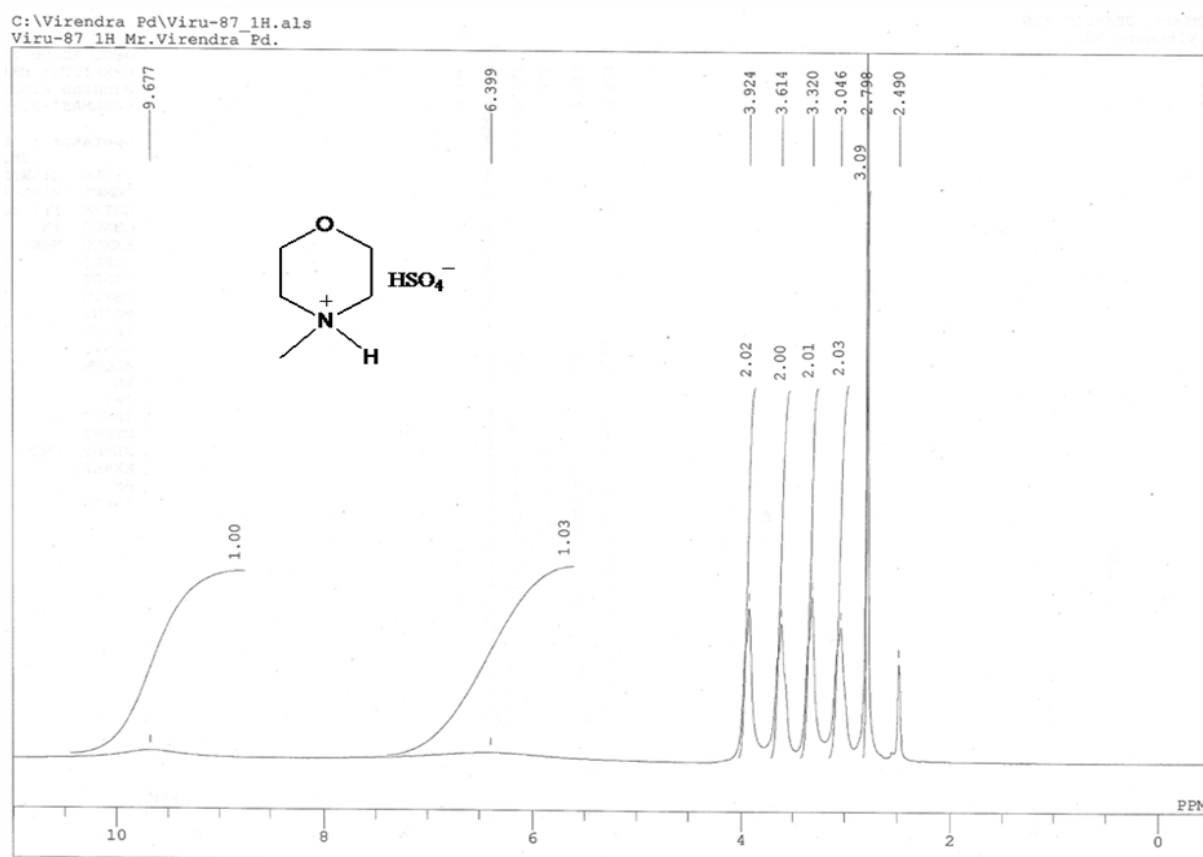

**Figure 4:**  $^1\text{H}$  NMR of *N*-methylmorpholinium hydrogen sulphate

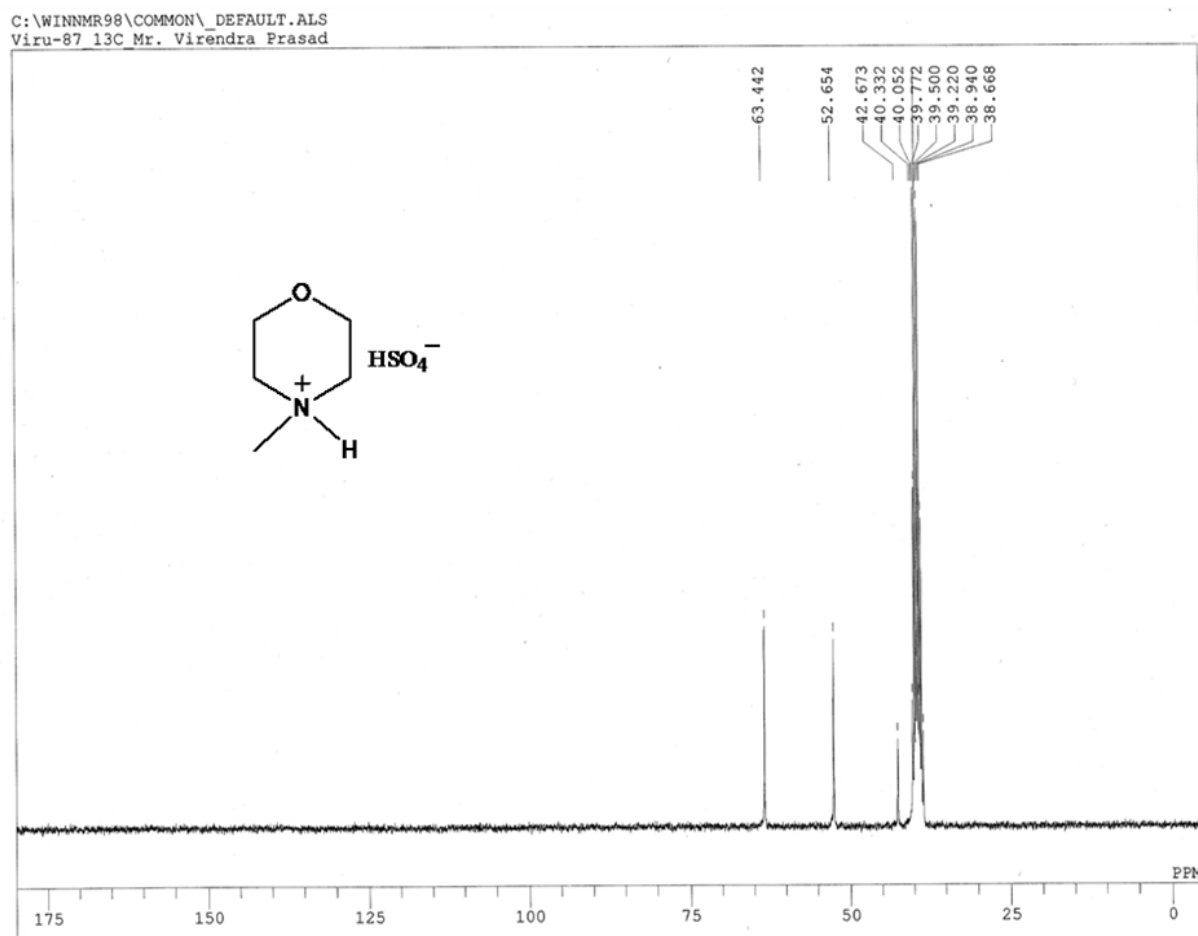

**Figure 5:**  $^{13}\text{C}$  NMR of *N*-methylmorpholinium hydrogen sulphate

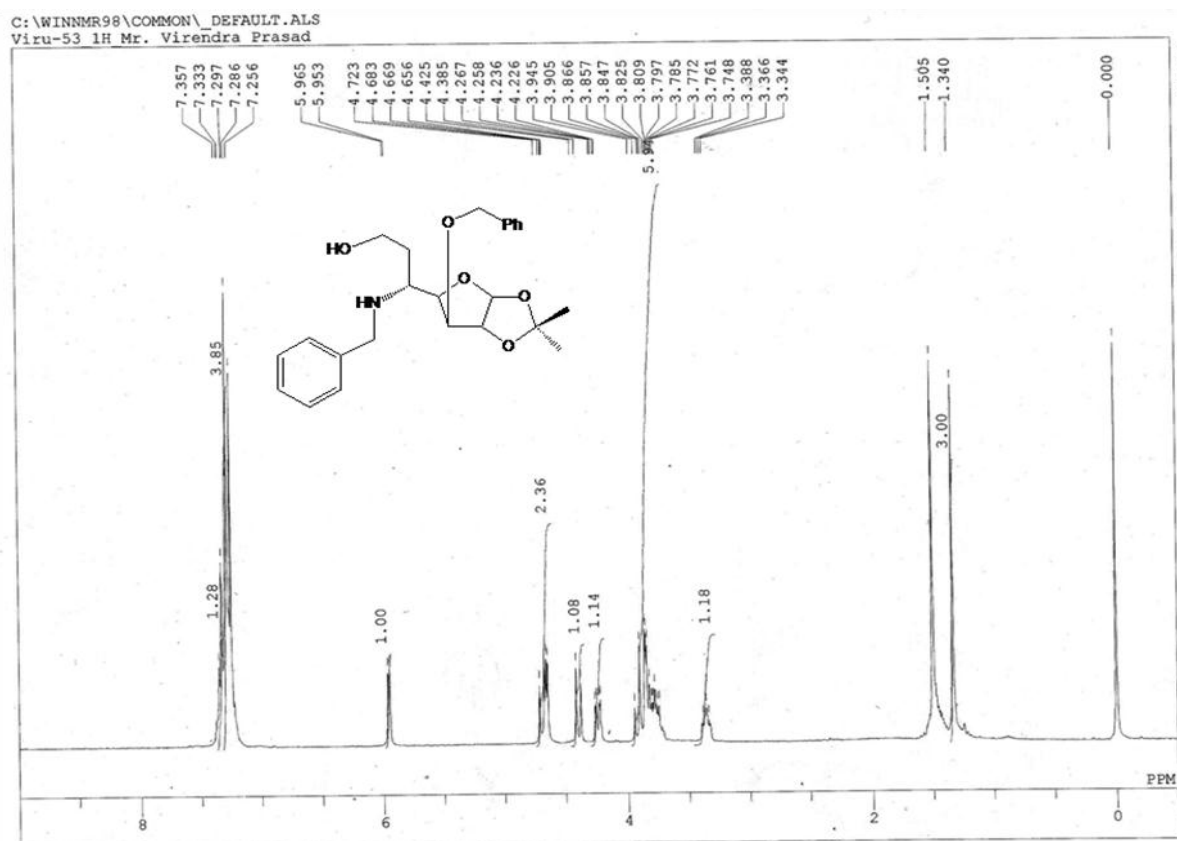

**Figure 6:**  $^1\text{H}$  NMR of 5-benzylamino-5,6-dideoxy-6-hydroxymethyl-1,2-*O*-isopropylidene- 3-*O*-benzyl- $\beta$ -L-ido-furanose

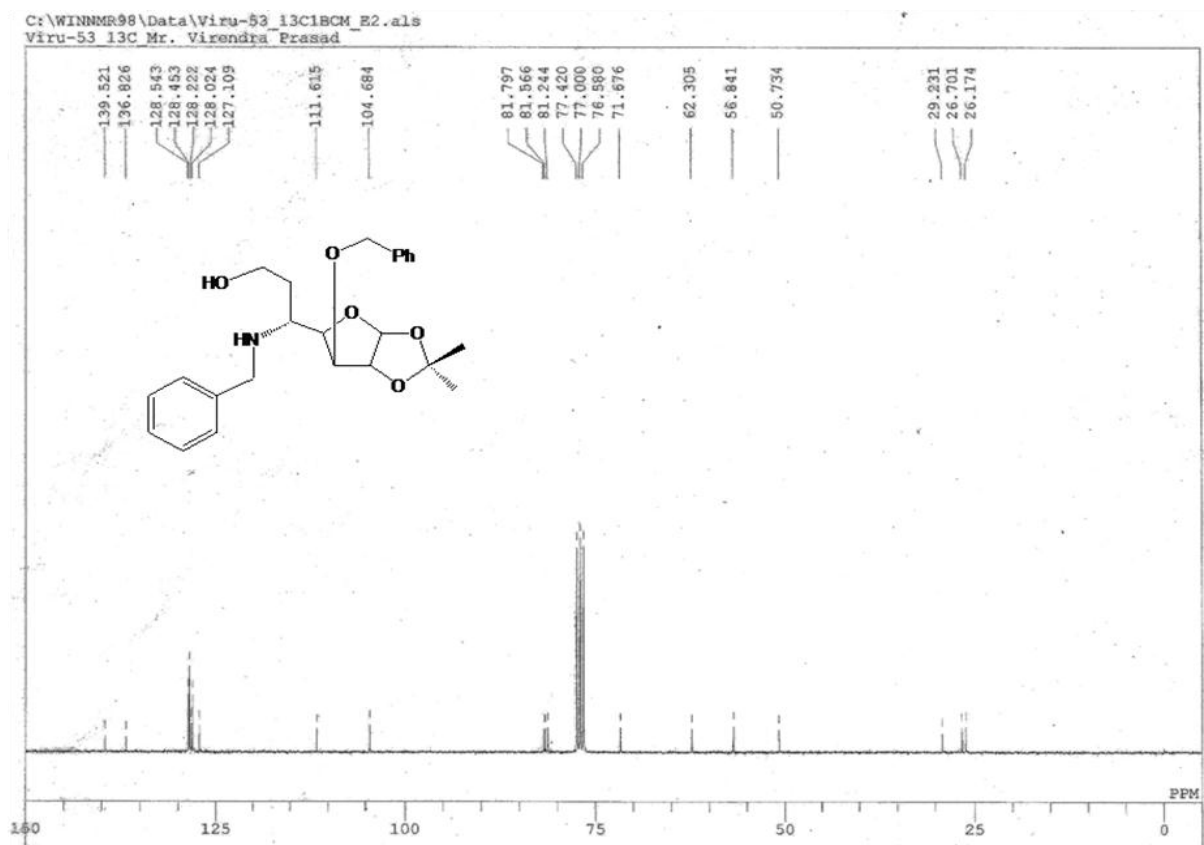

**Figure 7:**  $^{13}\text{C}$  NMR of 5-benzylamino-5,6-dideoxy-6-hydroxymethyl-1,2-*O*-isopropylidene- 3-*O*-benzyl- $\beta$ -L-ido-furanose

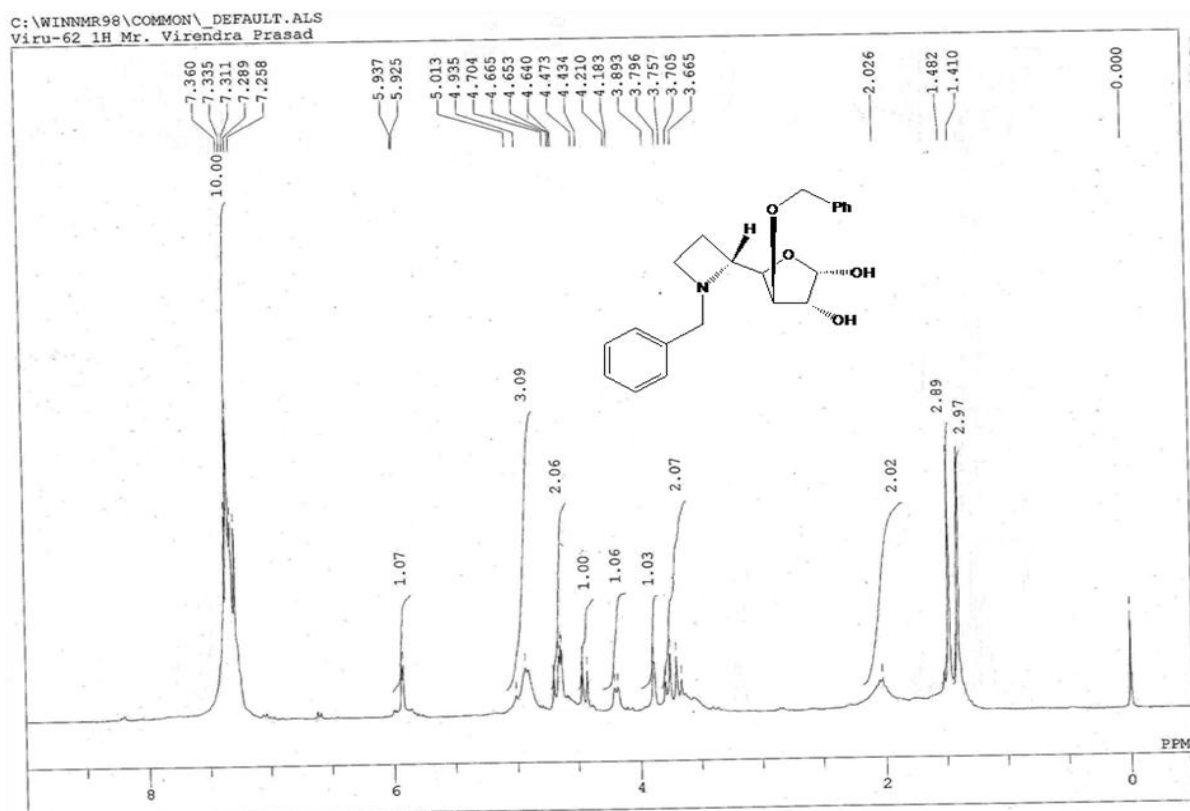

**Figure 8:**  $^1\text{H}$  NMR 2-(3-*O*-benzyl-1,2-*O*-isopropylidene- $\beta$ -L-ido-furanose)-1-benzyl azetidine

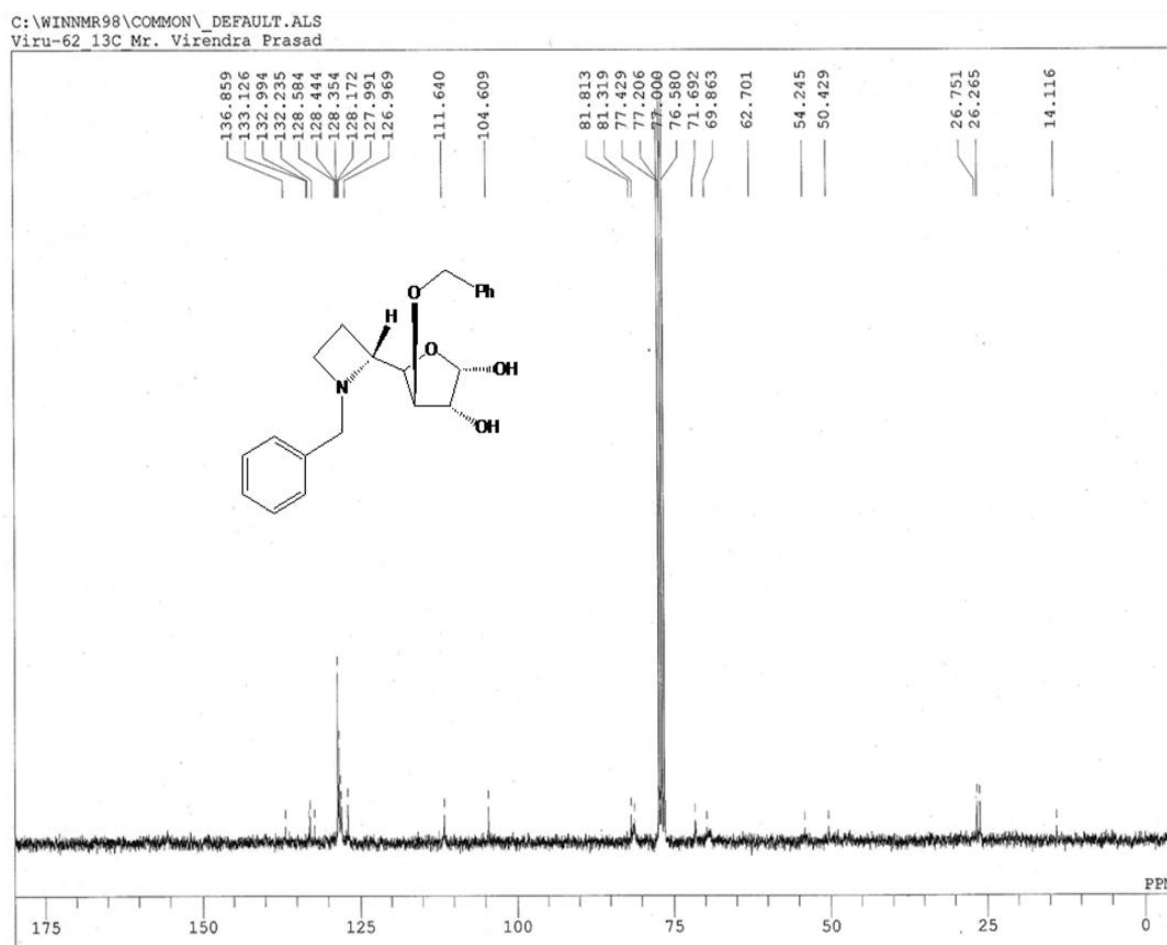

**Figure 9:**  $^{13}\text{C}$  NMR 2-(3-*O*-benzyl-1,2-*O*-isopropylidene- $\beta$ -L-ido-furanose)-1-benzyl azetidine

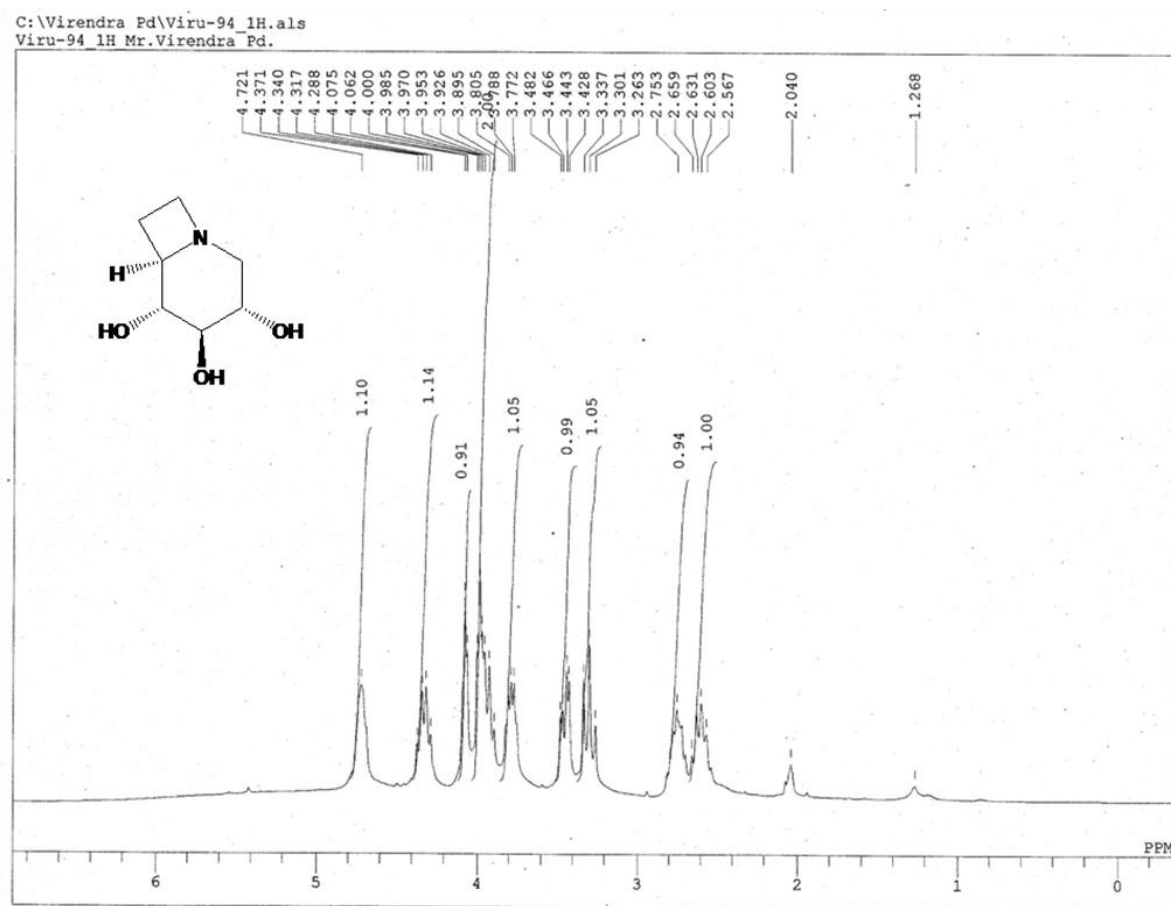

Figure 10:  $^1\text{H}$  NMR of 1-deoxy-norcastanospermine (in deuterated acetone)

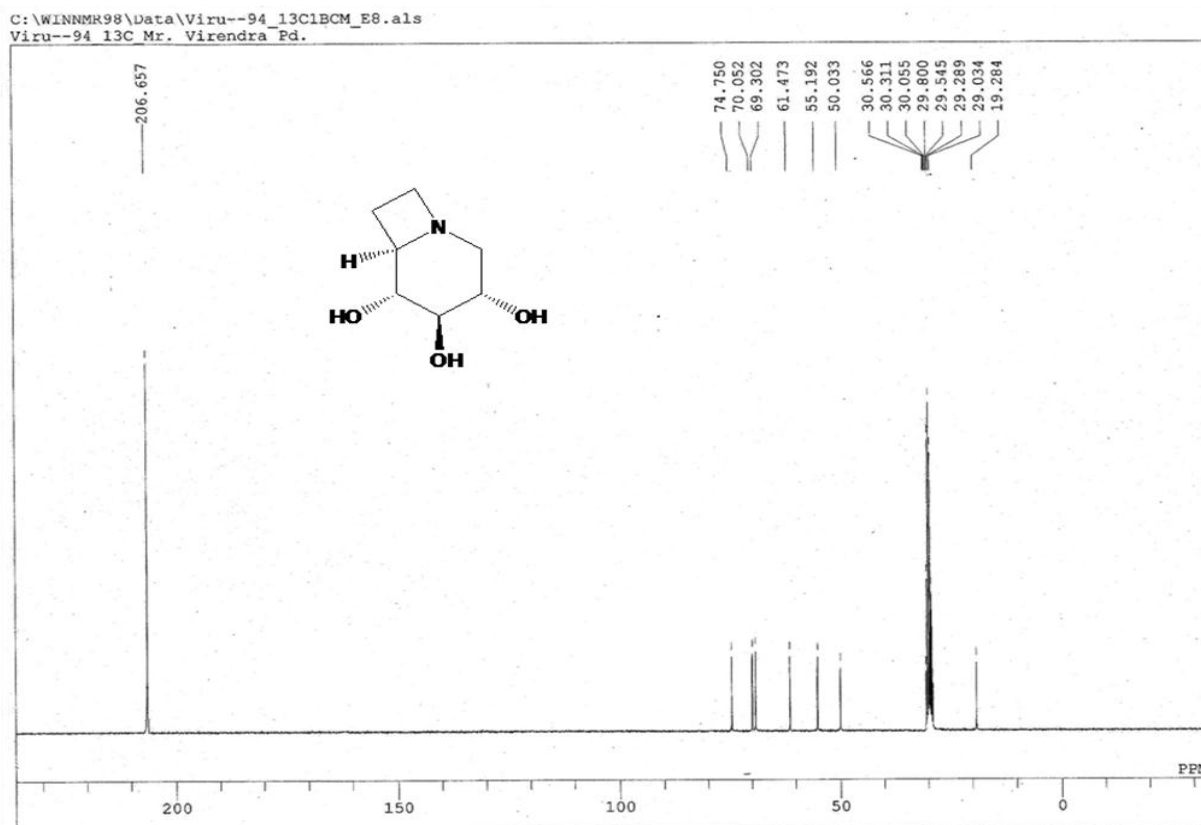

Figure 11:  $^{13}\text{C}$  NMR of 1-deoxy-norcastanospermine (in deuterated acetone)



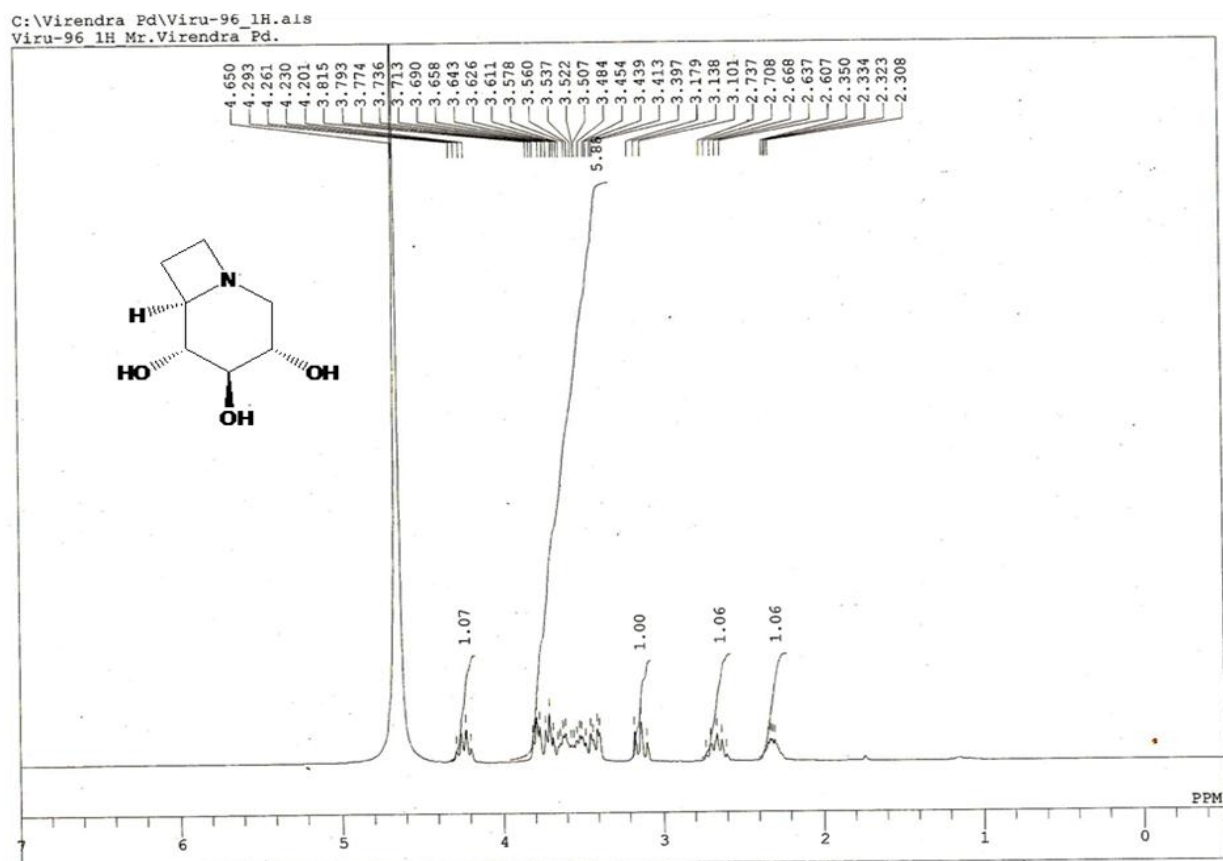

Figure 12:  $^1\text{H}$  NMR of 1-deoxy-norcastanospermine (in  $\text{D}_2\text{O}$ )

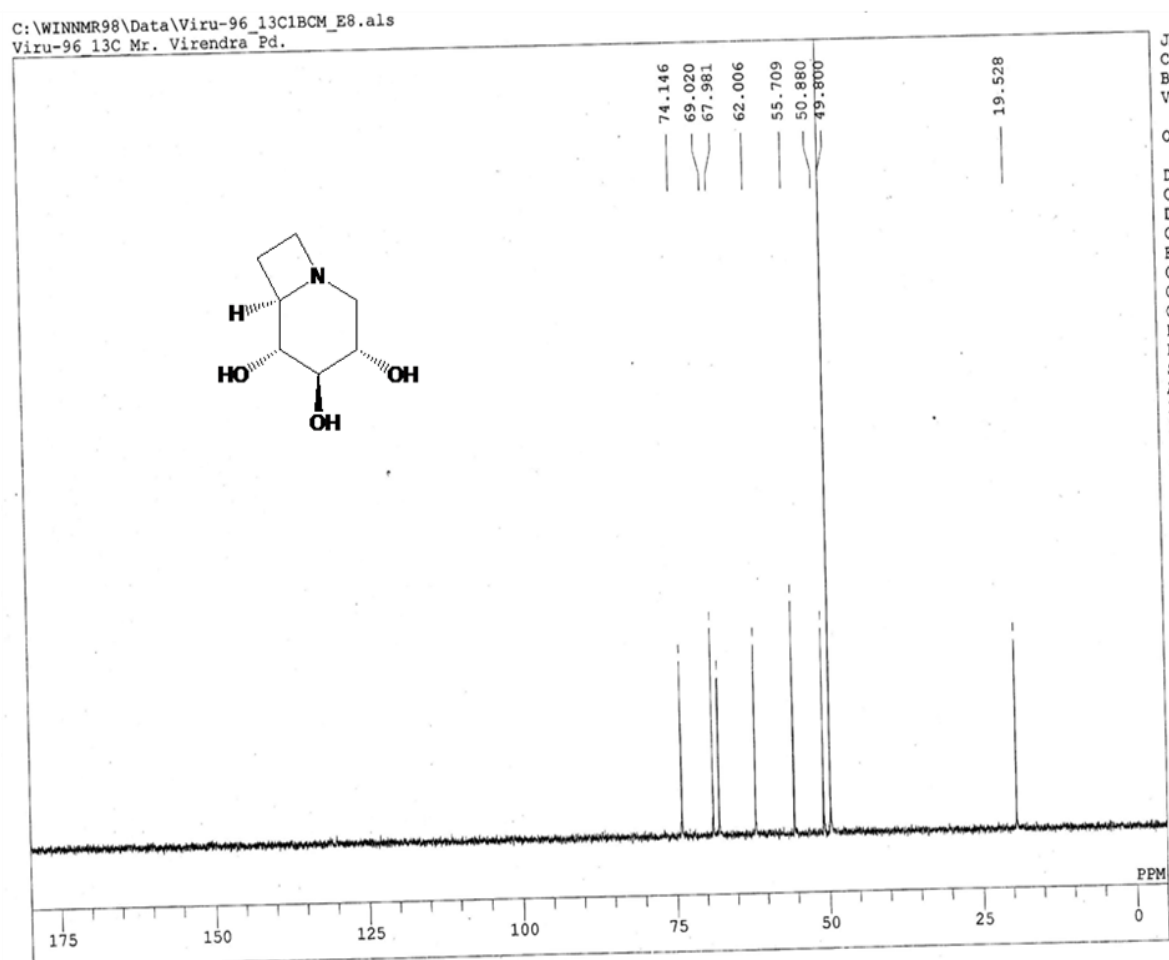

Figure 13:  $^{13}\text{C}$  NMR of 1-deoxy-norcastanospermine (in  $\text{D}_2\text{O}$ )
